# Supplementary material for: Adaptation of Fig Wasps (Agaodinae) to Their Host Revealed by Large-Scale Transcriptomic Data
Source: MDPI journal article supplement (doi:10.3390/insects12090815), 2021-09-11
Supplement: s1 [file s1]

Table S1. Summary of assembly results of transcriptome data for 25 fig wasp species

| Species                                       | Raw reads<br>(M) | Clean<br>reads (M) | Total number<br>of transcripts | Total number of<br>coding transcripts | Total number<br>of unigenes | Total<br>number | Coding unigenes       |        |
|-----------------------------------------------|------------------|--------------------|--------------------------------|---------------------------------------|-----------------------------|-----------------|-----------------------|--------|
|                                               |                  |                    |                                |                                       |                             |                 | N50<br>length<br>(bp) | GC%    |
| <i>Platyscapa. quadraticeps</i>               | 23.71            | 22.4               | 46,136                         | 29,486                                | 18,968                      | 14,792          | 1958                  | 36.52% |
| <i>P. sp.- F. concinna</i>                    | 25.22            | 24.08              | 36,172                         | 23,430                                | 12,933                      | 9,764           | 2728                  | 36.69% |
| <i>P. sp. - F. rumphii</i>                    | 22.72            | 21.46              | 39,384                         | 23,481                                | 13,935                      | 9,618           | 2409                  | 37.99% |
| <i>Eupristina altissima</i>                   | 27.30            | 26.21              | 44,258                         | 27,064                                | 16,368                      | 11,400          | 2477                  | 37.45% |
| <i>Valisia javana</i> sp. 1                   | 21.32            | 20.09              | 36,024                         | 22,468                                | 16,239                      | 10,295          | 2701                  | 37.68% |
| <i>V. javana</i> sp. 2                        | 20.78            | 19.58              | 48,063                         | 33,129                                | 26,637                      | 20,735          | 1713                  | 37.38% |
| <i>V. javana</i> sp. 7                        | 21.96            | 21.06              | 42,850                         | 26,714                                | 21,355                      | 14,528          | 2061                  | 36.97% |
| <i>V. javana</i> sp. 8                        | 23.78            | 22.54              | 42,058                         | 25,008                                | 16,876                      | 10,895          | 2539                  | 36.86% |
| <i>V. esquirolianae</i>                       | 26.80            | 25.71              | 45,285                         | 27,557                                | 17,421                      | 12,079          | 2653                  | 37.21% |
| <i>V. medusa</i>                              | 20.26            | 19.32              | 59,773                         | 33,883                                | 19,692                      | 12,373          | 2042                  | 36.77% |
| <i>V. cf filippina</i>                        | 25.71            | 22.54              | 183,404                        | 75,706                                | 139,669                     | 59,860          | 774                   | 47.10% |
| <i>V. malayana</i>                            | 22.53            | 21.31              | 43,592                         | 25,733                                | 13,955                      | 9,579           | 2345                  | 36.11% |
| <i>V. compacta</i>                            | 21.32            | 20.09              | 62,652                         | 33,460                                | 22,632                      | 13,739          | 1947                  | 36.64% |
| <i>V. sp.- F. langkokensis</i>                | 26.81            | 25.65              | 49,115                         | 28,856                                | 15,206                      | 10,427          | 2546                  | 36.75% |
| <i>B. sp.-F. abeli</i>                        | 26.42            | 25.73              | 67,309                         | 39,756                                | 19,412                      | 13,801          | 1965                  | 40.01% |
| <i>B. sp.-F. pyriformis</i>                   | 24.85            | 24.13              | 58,305                         | 34,306                                | 17,491                      | 11,803          | 2108                  | 39.43% |
| <i>B. sp.-F. erecta</i> var. <i>beeheyana</i> | 30.62            | 29.58              | 59,345                         | 34,685                                | 17,357                      | 11,839          | 2285                  | 37.52% |
| <i>B. sp.-F. formosa</i>                      | 27.12            | 26.35              | 74,714                         | 41,309                                | 20,222                      | 13,200          | 2297                  | 39.20% |
| <i>B. sp.-F. variolosa</i>                    | 25.71            | 24.84              | 71,482                         | 44,197                                | 24,438                      | 18,159          | 2073                  | 40.35% |
| <i>Ceratosolen appendiculatus</i>             | 25.44            | 24.5               | 58,303                         | 37,243                                | 27,749                      | 19,692          | 1875                  | 44.91% |

|                              |       |       |        |        |        |        |      |        |
|------------------------------|-------|-------|--------|--------|--------|--------|------|--------|
| <i>C. fusciceps</i>          | 20.12 | 18.93 | 80,161 | 38,280 | 28,912 | 17,304 | 1521 | 40.86% |
| <i>C. gravelyi</i>           | 20.13 | 19.08 | 42,529 | 24,183 | 15,620 | 10,103 | 1980 | 38.12% |
| <i>C. constrictus</i>        | 27.76 | 26.91 | 82,380 | 44,976 | 24,451 | 15,919 | 1933 | 40.27% |
| <i>C. solmi</i>              | 28.82 | 26.87 | 56,671 | 30,749 | 16,518 | 10,143 | 2498 | 38.51% |
| <i>Kradibia tentacularis</i> | 21.75 | 20.55 | 69,155 | 39,696 | 26,640 | 17,271 | 1670 | 40.58% |

Table S2. Summary of functional annotation of unigenes of 25 fig wasp species

| Species                         | Number<br>of<br>Proteins | Rate of Nr<br>annotated | Rate of<br>SwissProt<br>annotated | Rate of<br>KOG<br>annotated | Rate of<br>eggNOG<br>annotated | Rate of<br>PFAM<br>annotated | Rate of<br>KEGG<br>annotated | Rate of<br>GO<br>annotated | Rate of<br>annotated | Number of<br>Proteins<br>annotated |
|---------------------------------|--------------------------|-------------------------|-----------------------------------|-----------------------------|--------------------------------|------------------------------|------------------------------|----------------------------|----------------------|------------------------------------|
| <i>Platyscapa. quadraticeps</i> | 14792                    | 79.08%                  | 64.18%                            | 48.13%                      | 76.16%                         | 73.43%                       | 60.96%                       | 51.40%                     | 86.24%               | 12757                              |
| <i>P. sp.- F. concinna</i>      | 9764                     | 85.89%                  | 66.15%                            | 46.89%                      | 82.72%                         | 74.71%                       | 58.47%                       | 52.92%                     | 88.99%               | 8689                               |
| <i>P. sp. - F. rumphii</i>      | 9618                     | 77.66%                  | 60.87%                            | 44.47%                      | 74.79%                         | 67.97%                       | 55.48%                       | 49.14%                     | 81.71%               | 7859                               |
| <i>Eupristina altissima</i>     | 11400                    | 82.83%                  | 65.15%                            | 45.81%                      | 79.82%                         | 73.12%                       | 57.39%                       | 51.46%                     | 86.64%               | 9877                               |
| <i>Valisia javana</i> sp. 1     | 10295                    | 79.24%                  | 60.97%                            | 43.29%                      | 76.23%                         | 69.14%                       | 53.23%                       | 48.46%                     | 81.76%               | 8417                               |
| <i>V. javana</i> sp. 2          | 20735                    | 77.32%                  | 62.53%                            | 46.36%                      | 74.06%                         | 72.58%                       | 58.16%                       | 47.20%                     | 84.70%               | 17563                              |
| <i>V. javana</i> sp. 7          | 14528                    | 80.76%                  | 62.27%                            | 45.09%                      | 76.60%                         | 70.43%                       | 57.50%                       | 49.91%                     | 85.50%               | 12422                              |
| <i>V. javana</i> sp. 8          | 10895                    | 79.93%                  | 61.62%                            | 43.48%                      | 77.06%                         | 70.19%                       | 54.92%                       | 49.73%                     | 83.49%               | 9096                               |
| <i>V. esquirolianae</i>         | 12079                    | 76.39%                  | 57.84%                            | 41.20%                      | 72.08%                         | 66.80%                       | 52.67%                       | 45.67%                     | 79.71%               | 9628                               |
| <i>V. medusa</i>                | 12373                    | 80.54%                  | 61.58%                            | 45.23%                      | 76.51%                         | 70.11%                       | 57.59%                       | 50.13%                     | 85.88%               | 10626                              |
| <i>V. cf filippina</i>          | 59860                    | 75.50%                  | 51.17%                            | 27.18%                      | 61.03%                         | 66.80%                       | 56.10%                       | 33.72%                     | 87.44%               | 52340                              |
| <i>V. malayana</i>              | 9579                     | 82.95%                  | 64.58%                            | 46.22%                      | 79.91%                         | 72.35%                       | 59.17%                       | 52.06%                     | 87.42%               | 8374                               |
| <i>V. compacta</i>              | 13739                    | 81.44%                  | 64.17%                            | 46.24%                      | 78.48%                         | 72.01%                       | 59.02%                       | 49.92%                     | 87.09%               | 11965                              |
| <i>V. sp. - F. langkokensis</i> | 10427                    | 85.11%                  | 66.89%                            | 47.03%                      | 82.11%                         | 74.83%                       | 60.27%                       | 53.24%                     | 89.53%               | 9335                               |
| <i>B. sp.-F. abeli</i>          | 13801                    | 76.69%                  | 57.75%                            | 41.21%                      | 73.97%                         | 66.47%                       | 54.06%                       | 47.32%                     | 82.65%               | 11407                              |

|                                                  |       |        |        |        |        |        |        |        |        |       |
|--------------------------------------------------|-------|--------|--------|--------|--------|--------|--------|--------|--------|-------|
| <i>B. sp.-F.pyriformis</i>                       | 11803 | 78.90% | 60.13% | 42.92% | 76.34% | 68.22% | 54.95% | 49.41% | 84.09% | 9925  |
| <i>B. sp.-F. erecta</i> var.<br><i>beeheyana</i> | 11839 | 83.97% | 65.03% | 44.79% | 81.15% | 72.76% | 56.06% | 52.35% | 88.16% | 10437 |
| <i>B. sp.-F. formosa</i>                         | 13200 | 71.45% | 54.37% | 37.73% | 68.13% | 61.99% | 49.67% | 43.28% | 75.99% | 10031 |
| <i>B. sp.-F. variolosa</i>                       | 18159 | 78.97% | 60.59% | 44.20% | 75.45% | 68.70% | 57.43% | 49.57% | 84.56% | 15356 |
| <i>Ceratosolen</i><br><i>appendiculatus</i>      | 19692 | 77.37% | 59.72% | 44.25% | 72.79% | 67.81% | 39.59% | 40.69% | 88.48% | 17423 |
| <i>C. fusciceps</i>                              | 17304 | 72.03% | 56.69% | 40.26% | 69.02% | 64.78% | 54.26% | 43.88% | 79.56% | 13767 |
| <i>C. gravelyi</i>                               | 10103 | 77.45% | 59.38% | 43.66% | 73.85% | 67.12% | 56.78% | 48.34% | 84.58% | 8545  |
| <i>C. constrictus</i>                            | 15919 | 75.12% | 60.13% | 44.68% | 71.93% | 68.72% | 57.24% | 48.67% | 81.98% | 13050 |
| <i>C. solmi</i>                                  | 10143 | 81.17% | 62.27% | 43.27% | 77.93% | 70.01% | 55.20% | 49.98% | 84.91% | 8612  |
| <i>Kradibia tentacularis</i>                     | 17271 | 75.59% | 58.08% | 43.52% | 71.50% | 65.54% | 55.64% | 47.26% | 81.38% | 14055 |
| Median                                           | 12373 | 78.97% | 60.97% | 44.25% | 76.16% | 69.14% | 56.1%  | 49.41% | 84.7%  | 10437 |
