# Supplementary figures and images for: Adaptation of Fig Wasps (Agaodinae) to Their Host Revealed by Large-Scale Transcriptomic Data
Source: MDPI journal article supplement (doi:10.3390/insects12090815), 2021-09-11

(a)

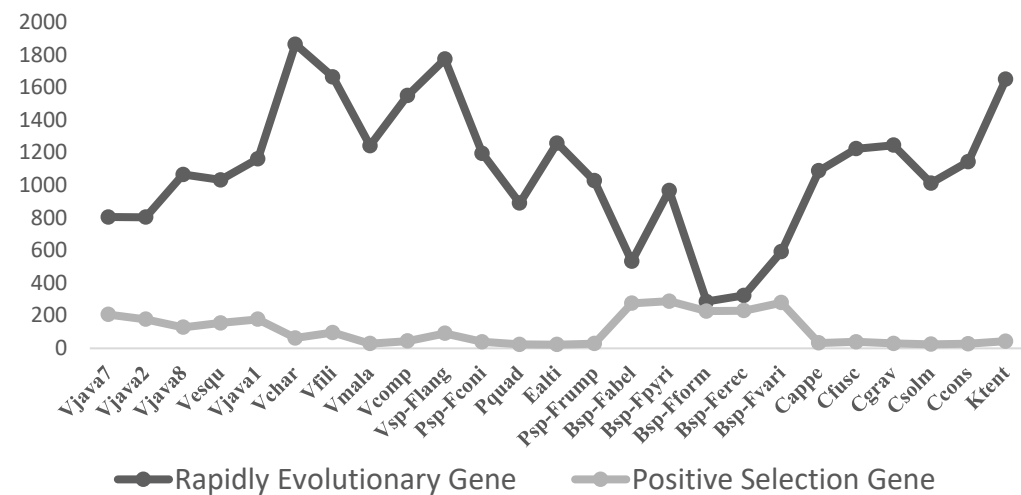

(b)

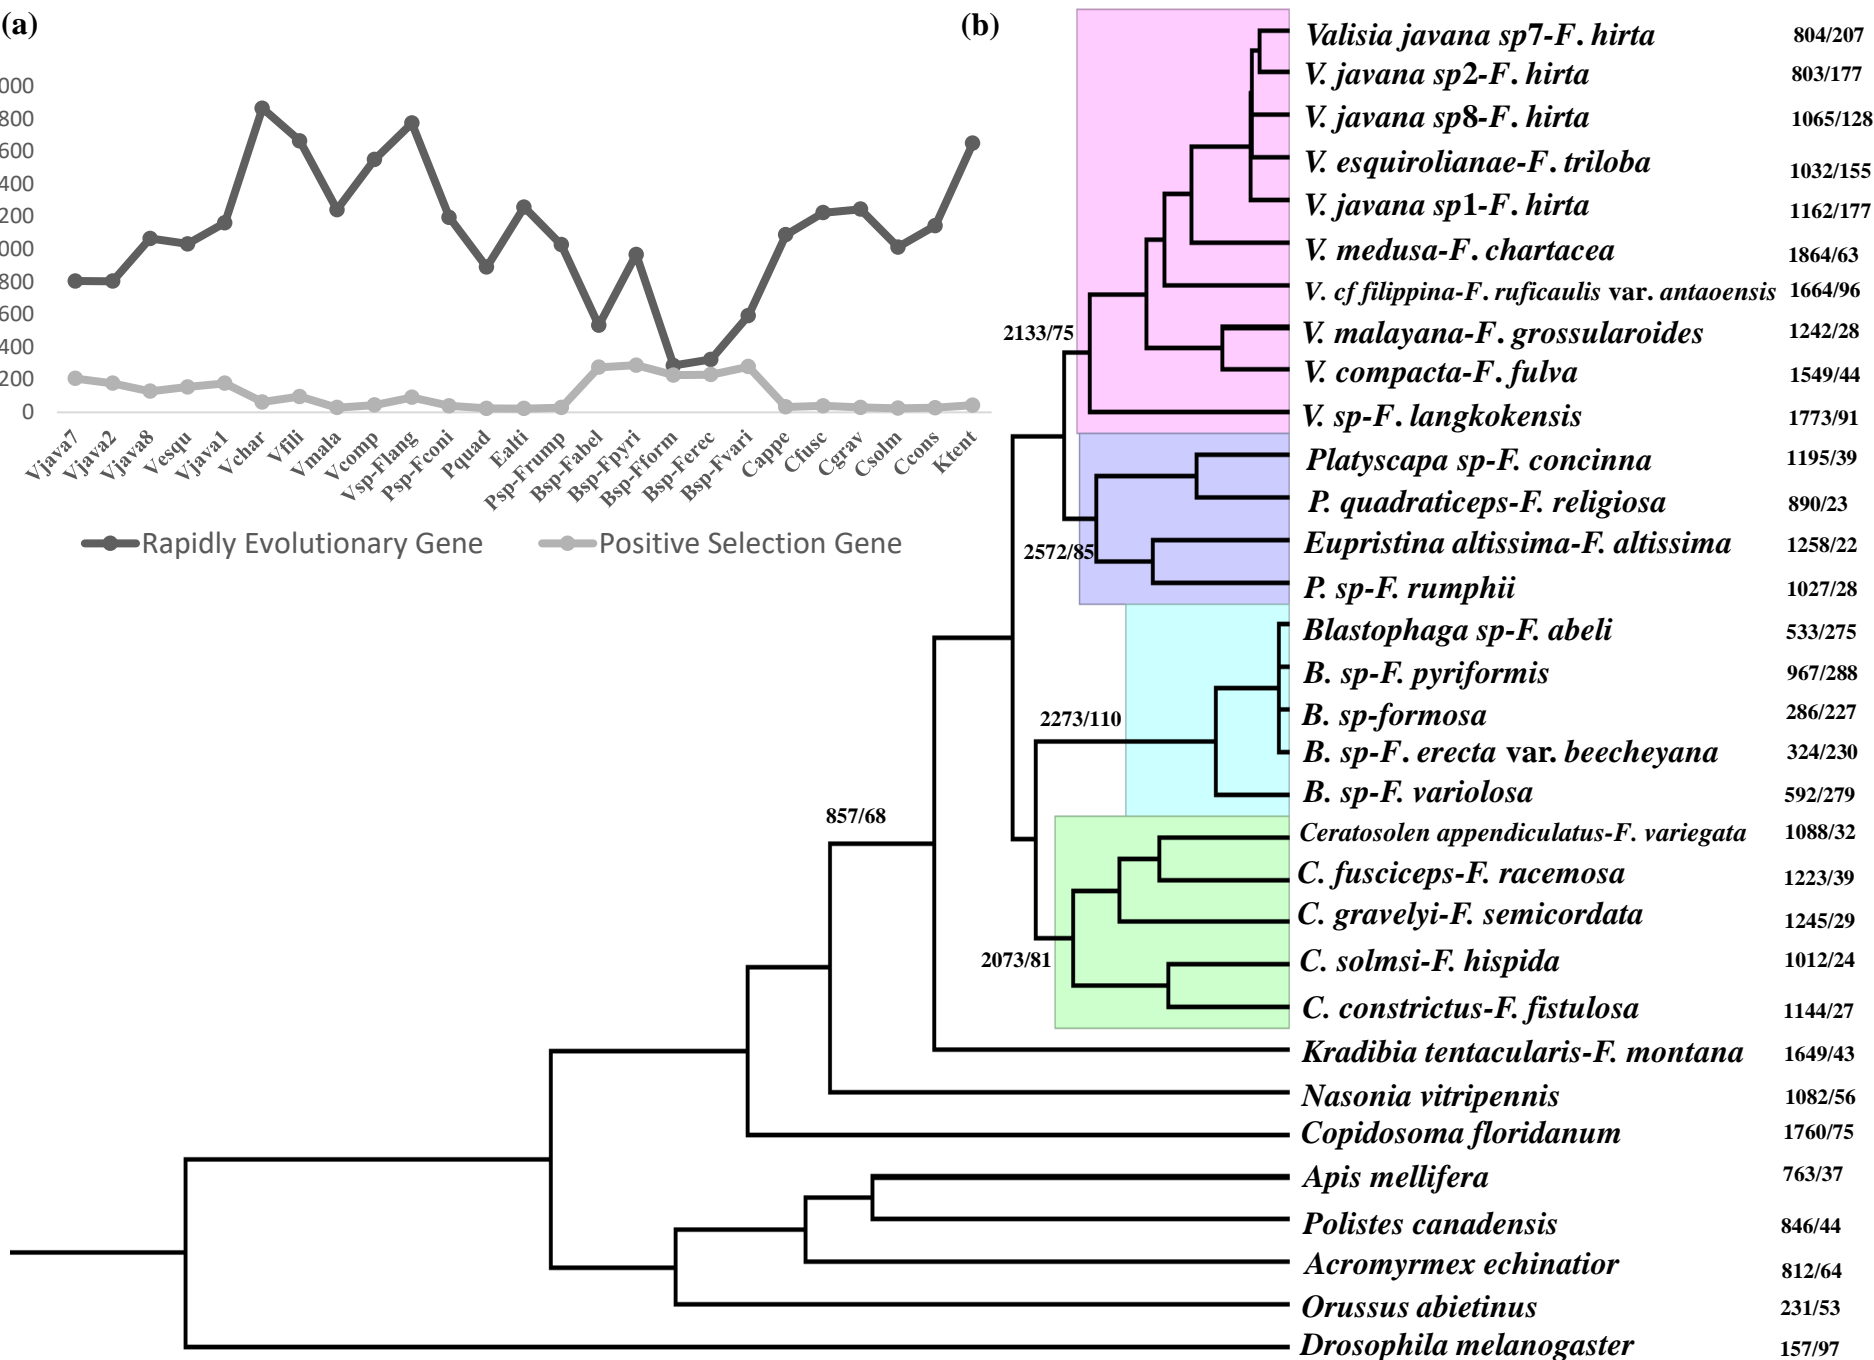

Supplement: s1 [file s1]
